# Supplementary material
Source: PubMed Central journal article supplement (PMC4554503)
Supplement: 10-1055-s-0035-1557819-sup_gf938.pdf [file 10-1055-s-0035-1557819-sup_gf938.pdf]

# Sonografie der Nabelschnur

## Sonographic Assessment of the Umbilical Cord

### Autoren

S. Bosselmann<sup>1,2</sup>, G. Mielke<sup>2</sup>

### Institute

<sup>1</sup> Frauenklinik, Universitätsklinikum Heidelberg, Heidelberg

<sup>2</sup> Pränatalzentrum Stuttgart, Stuttgart

### Schlüsselwörter

- Ultraschall
- Fetalzeit
- Nabelschnur

### Key words

- ultrasound
- fetal period
- umbilical cord

### Zusammenfassung

Die Nabelschnur ist die lebenswichtige Verbindung zwischen Fetus und Plazenta. Sie bildet einerseits eine stabile Verbindung zur zentralen Einheit des fetomaternalen Stoffwechsels und ermöglicht dem Feten andererseits eine Beweglichkeit, die für die körperliche – insbesondere die neuromotorische – Entwicklung von großer Bedeutung ist. Diese Kombination aus mechanischer Stabilität und Flexibilität begründet sich in der Architektur der Nabelschnur. Es gibt jedoch eine Reihe an Nabelschnurkomplikationen, die den Feten z.T. lebensbedrohlich gefährden können. Auch diese lassen sich vor allem auf die strukturellen Eigenschaften der Nabelschnur zurückführen. Im Rahmen einer Übersichtsarbeit werden klinisch relevante Aspekte der sonografischen Diagnostik der Nabelschnur besprochen.

### Abstract

The umbilical cord (UC) is a vital connection between fetus and placenta. It constitutes a stable connection to the fetomaternal interface, while allowing the fetal mobility that is of great importance for fetal development in general and fetal neuromotor development in particular. This combination of mechanical stability and flexibility is due to the architecture of the UC. There is however a range of umbilical cord complications that may be life threatening to the fetus and these too can be explained to a large extent by the cord's structural characteristics. This review article discusses clinically relevant aspects of UC ultrasound.

### Einleitung

Die Nabelschnur ist augenscheinlich die lebenswichtige Verbindung zwischen Fetus und Plazenta. Sie bildet einerseits eine stabile Verbindung zur zentralen Einheit des fetomaternalen Stoffwechsels und ermöglicht dem Feten andererseits eine Beweglichkeit, die für die körperliche – insbesondere die neuromotorische – Entwicklung von großer Bedeutung ist. Diese Kombination aus mechanischer Stabilität und Flexibilität begründet sich in der Architektur der Nabelschnur. Es gibt jedoch eine Reihe an Nabelschnurkomplikationen, die den Feten lebensbedrohlich gefährden können. Auch diese lassen sich vor allem auf die strukturellen Eigenschaften der Nabelschnur zurückführen. Mittels dopplersonografischer Untersuchungen der Nabelschnurgefäße lassen sich Rückschlüsse auf das fetoplazentare Gefäßbett ziehen und so eine zentrale Aussage zum fetalen Zustand gewinnen.

### Entwicklung und Architektur der Nabelschnur

Die Nabelschnur entwickelt sich in der Embryonalzeit im Bereich des Haftstiels (engl.: body stalk) und wird zur Verbindung des Embryos zum fetalen Anteil der Plazenta. Die Amnionhöhle breitet sich von dorsal nach ventral aus, während die Chorionhöhle an Volumen verliert. Im Rahmen der zephalokaudalen und lateralen Abfaltung entsteht die frühe Nabelschnur durch ein „Überstülpen“ des Amnions (● Abb. 1) (siehe auch Lehrbücher der Embryologie, [www.embryology.ch](http://www.embryology.ch)). In diesem frühen Stadium, nach 7–8 Wochen (post menstruationem) enthält die Nabelschnur neben dem Haftstiel mit den Nabelschnurgefäßen auch noch weitere Strukturen, die sich im weiteren Verlauf zurückbilden und obliterieren: das Allantoisdivertikel (Ausstülpung aus dem Endoderm mit Verbindung zur [späteren] Harnblase – wird zum Urachus), sowie das extra-

eingereicht 13.4.2015

revidiert 30.5.2015

akzeptiert 3.6.2015

### Bibliografie

**DOI** <http://dx.doi.org/10.1055/s-0035-1557819>  
Geburtsh Frauenheilk 2015; 75:  
1–11 © Georg Thieme  
Verlag KG Stuttgart · New York ·  
ISSN 0016-5751

### Korrespondenzadresse

**Dr. Stephan Bosselmann**  
Universitätsklinikum Heidelberg  
Frauenklinik  
Im Neuenheimer Feld 440  
69120 Heidelberg  
[Stephan.Bosselmann@med.uni-heidelberg.de](mailto:Stephan.Bosselmann@med.uni-heidelberg.de)

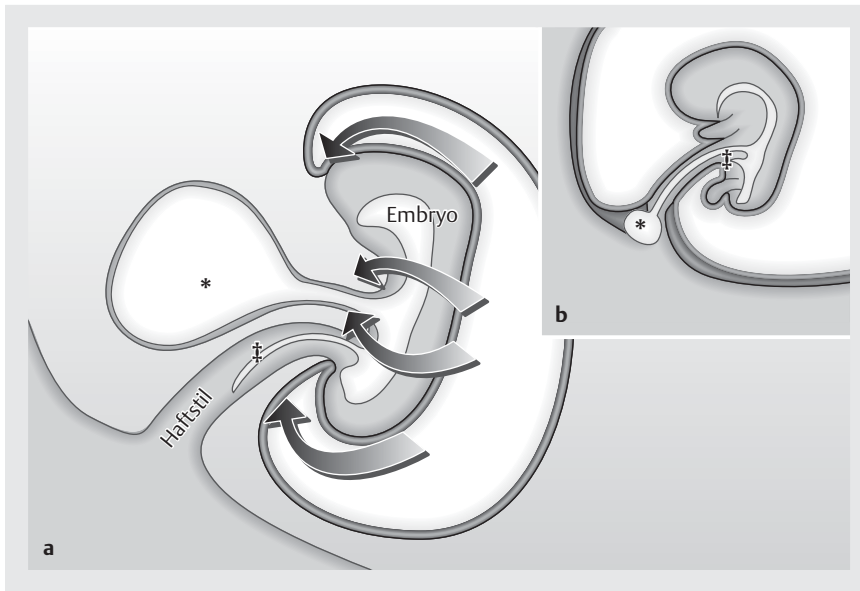

**Abb. 1 a und b** Schematische Darstellung in der Frühphase der Nabelschnurentwicklung (adaptiert nach [www.embryology.ch](http://www.embryology.ch)). In **b** ist die Nabelschnur durch „Überstülpen des Amnions“ entstanden (Einzelheiten im Text). Legende: Dottersack (\*), Allantois (§), rot: Ektoderm/Amnion, gelb: Mesoderm, grün: extraembryonales Zölon/Chorionhöhle.

embryonale Zölon, das zu diesem Zeitpunkt noch eine Verbindung zur Chorionhöhle darstellt und den Ductus omphaloentericus enthält (als Verbindung zum Dottersack).

Zunächst liegen 4 Nabelschnurgefäße vor: 2 Arterien und 2 Venen. Von den Venen atrophiert typischerweise die rechte im Verlauf. So entsteht die normale 3-gefäßige Nabelschnur mit einer Vene, die das oxygenierte Blut zum Feten führt und 2 Arterien, die das Blut in entgegengesetzter Richtung zur Plazenta transportieren (die Bezeichnung der Gefäße berücksichtigt den Bezug zum fetalen Herzen, nicht den Sauerstoffgehalt des Blutes).

Trotz ihres hohen Grades an Flexibilität besitzt die Nabelschnur eine mechanische Stabilität, welche die Nabelschnurgefäße vor Kompression und Abknickung einerseits und vor Ruptur andererseits schützt. Wesentlich für diese mechanische Stabilität sind die äußere Hülle der Nabelschnur, die durch das Amnion gebildet wird, sowie die sogenannte Wharton-Sulze – das Bindegewebe der Nabelschnur mit extrazellulärer Matrix. Das Amnion schützt die Nabelschnurgefäße als äußere Hülle vor Zugkräften. Von größerer Bedeutung ist jedoch der Schutz vor Kompression. Die extrazelluläre Matrix (Proteoglykane, Hyaluronsäure, u.a.) der Wharton-Sulze bindet Wasser und weist eine hochvisköse, gelartige Konsistenz auf [1]. Zusätzlich sind kollagene Fasern konzentrisch um die Nabelschnurgefäße angeordnet. Punktuell einwirkender Druck wird somit abgefedert und die Gefahr für einen mechanischen Verschluss der Nabelschnurgefäße, z.B. durch normale Kindsbewegungen, wird deutlich reduziert. Normwerte für den Nabelschnurdurchmesser und die Querschnittsfläche wurden in Abhängigkeit des Gestationsalters entwickelt. Sie nehmen bis zur 32. SSW zu und korrelieren mit der fetalen Biometrie sowie dem Gehalt an Wharton-Sulze [2].

Beide Nabelschnurarterien gehören funktionell zum gleichen Abschnitt des fetoplazentaren Kreislaufsystems. Neben ihrer engen Lagebeziehung innerhalb der Nabelschnur sind die Lumina über die sogenannte Hyrtl-Anastomose miteinander verbunden. Benannt nach dem Erstbeschreiber Josef Hyrtl, findet sie sich meist innerhalb der letzten 3 cm vor der plazentaren Insertion und dient zum Druck- und Volumenausgleich bei Unterschieden in den nachgeschalteten plazentaren Stromgebieten [3]. Dieser Druckausgleich scheint insbesondere bei uterinen Kontraktionen von Bedeutung zu sein. Unterschiede im Kaliber und im Wider-

stand beider Nabelschnurarterien sind in Zusammenhang mit Insertionspathologien (s.u.) und dem Fehlen der Hyrtl-Anastomose beschrieben [4]. Anatomische Varianten der Hyrtl-Anastomose sind z.B. in Verbindung mit hypertensiven Schwangerschaftserkrankungen beschrieben. Die pränatale Darstellung der Hyrtl-Anastomose ist möglich [5,6].

Die Nabelschnurarterien winden sich in unterschiedlicher Ausprägung um die Nabelvene herum. Der 1994 von Strong et al. beschriebene Coiling-Index [7] gibt die Anzahl kompletter Windungen der Nabelschnurarterien pro Zentimeter Nabelschnurlänge an. Normwerte liegen im Bereich von 0,3–0,5 Windungen/cm, wobei der Coiling-Index mit zunehmendem Schwangerschaftsalter abnimmt [8–10]. Während ein ungünstiges Outcome sowohl bei „hypercoiling“ (intrauterine Wachstumsrestriktion [IUGR], wehenabhängige Auffälligkeiten der fetalen Herzfrequenz, geringes Geburtsgewicht, Thrombosen und Gefäßstenosen), als auch bei „hypocoiling“ (Oligohydramnion, Auffälligkeiten der fetalen Herzfrequenz unter der Geburt, geringes Geburtsgewicht, vaginal-operative Entbindungen, intrauteriner Fruchttod) beschrieben wurde [8, 11], konnten sowohl im Rahmen eines systematischen Reviews als auch im großen eigenen Niedrigrisikokollektiv der Autoren keine diesbezüglichen Assoziationen mit dem neonatalen Outcome nachgewiesen werden [12]. Zur Häufigkeit von Chromosomenstörungen bei auffälligem Coiling-Index existieren ebenfalls widersprüchliche Daten [10].

Aktuell gehören weder die Nabelschnurbiometrie noch die Bestimmung des Coiling-Index oder die Untersuchung der Hyrtl-Anastomose zur Routine in der pränatalen Untersuchung der Nabelschnur.

Klinisch relevant sind vor allem die Länge der Nabelschnur, ihre Beschaffenheit an beiden Enden, sowie die Charakteristika der einzelnen Gefäße. Die Sonografie der Nabelschnur unter klinischen Aspekten wird im Weiteren unter Berücksichtigung des Schwangerschaftsalters bei möglicher Diagnosestellung detailliert besprochen.

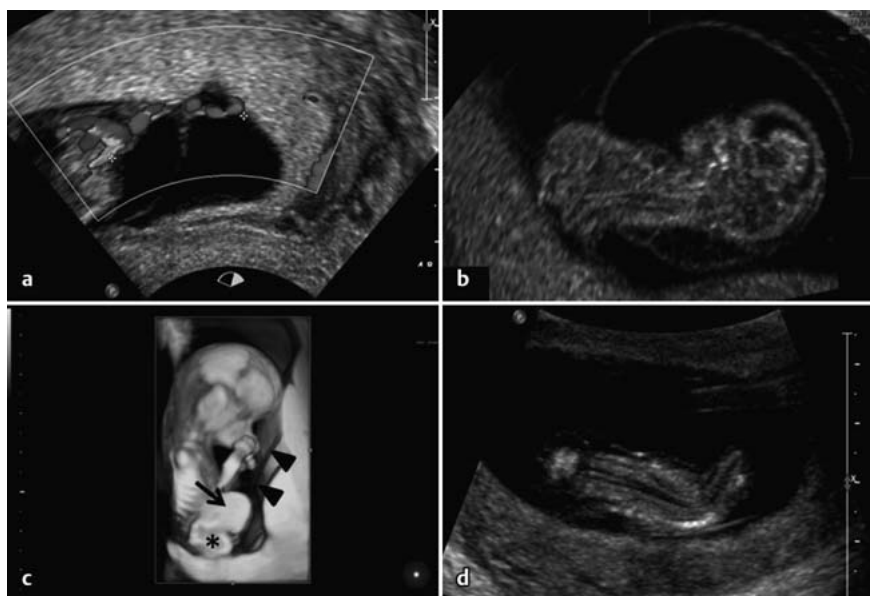

**Abb. 2a bis d** Sonografische Auffälligkeiten bei „Body-Stalk-Anomalie“.

**a** Kurze Nabelschnur.

**b** Partiiell extraamniotale Lage des Fetus – die obere Körperhälfte ist vom kreisförmig dargestellten Amnion umgeben, während die untere Körperhälfte außerhalb des Amnions zu liegen kommt.

**c** 3-D-Oberflächendarstellung desselben Fetus wie in **b**. Sichtbar ist der große Bauchwanddefekt mit Herniation von Leber (→) und Darm (\*). Auch das Amnion ist zu erkennen (▶) – es reicht bis zum Bauchwanddefekt.

**d** Skoliose bei einem anderen Fetus mit Body-Stalk-Anomalie.

## Diagnostik im 1. Trimenon

### Länge der Nabelschnur, Body-Stalk-Anomalie

Die Länge der Nabelschnur variiert. Bei Geburt gelten 35–70 cm als normal. Kürzere und längere Varianten gehen mit einer erhöhten Komplikationsrate unter Geburt einher [13]. Somit ist die Länge der Nabelschnur für die Abschätzung fetaler Risiken von Bedeutung. Pränatal lässt sich die Nabelschnurlänge allerdings nur sehr schwer abschätzen. Als entscheidender Wachstumsreiz werden Zugkräfte durch fetale Bewegungen im 1. Trimenon angenommen [14]. Eine kurze Nabelschnur ist entsprechend mit mangelnden Kindsbewegungen und deren möglichen Ursachen assoziiert (z. B. Fehlbildungen, Myopathien, Neuropathien, Oligohydramnion).

Eine besonders kurze Nabelschnur liegt bei der „Body-Stalk-Anomalie“ vor, die im deutschsprachigen Raum auch als „Syndrom der kurzen Nabelschnur“ bezeichnet wird. Die Inzidenz wird abhängig vom Gestationsalter bei Diagnosestellung im Bereich zwischen 1:7500 bis 1:31000 angegeben. Spontanaborte treten häufig auf [15]. Sonografisch lässt sich diese Anomalie bereits im 1. Trimenon darstellen (● **Abb. 2**). Sie ist durch multiple Fehlbildungen charakterisiert, zu denen ein Bauchwanddefekt, eine auffallend kurze bis fehlende Nabelschnur, ggf. mit singulärer Nabelschnurarterie und einer konsekutiv fixierten Lage des Fetus an der Plazenta, sowie Deformitäten der unteren Extremitäten gehören. Es existiert der Begriff des „Limb-Body Wall Complex“, der jedoch am ehesten als Variante der „Body-Stalk-Anomalie“ anzusehen ist [16]. Zusätzlich treten häufig Deformitäten der fetalen Wirbelsäule (Kyphoskoliose) und kraniale Defekte auf. Die Nackentransparenzmessung und das Alpha-Feto-Protein (AFP) im mütterlichen Serum sind typischerweise erhöht, während der fetale Karyotyp in der Regel unauffällig ist [17]. Ursächlich liegt dem Syndrom eine Fehlentwicklung im Bereich des Haftstiels zugrunde, was zur typischen Lage der unteren Extremitäten und abdominalen Organe im extraembryonalen Zölon (Chorionhöhle) passt. Die obere Körperhälfte liegt innerhalb der Amnionhöhle. Einige Autoren vergleichen die Pathologie mit einer extremen Form einer Amnion-Band-Sequenz, obwohl unterschiedliche Theorien zur Pathogenese existieren.

**Tab. 1** Differenzialdiagnosen bei Nachweis eines Bauchwanddefekts.

| Bezeichnung                    | strukturelle Auffälligkeiten                                                                                                                         |
|--------------------------------|------------------------------------------------------------------------------------------------------------------------------------------------------|
| Body-Stalk-Anomalie            | ventrale Spaltbildung, kurze bis fehlende Nabelschnur, partielle Lage im extraembryonalen Zölon, ggf. zusätzliche Fehlbildungen (kranial, vertebral) |
| Limb-Body Wall Complex         | wie oben mit Fehlbildung der unteren Extremitäten                                                                                                    |
| Cantrell-Anomalie (Pentalogie) | Bauchwanddefekt (Omphalozele), Defekt des unteren Sternums, anteriore Zwerchfellhernie, Perikarddefekt/ Ektopia cordis, struktureller Herzfehler     |
| OEIS Complex                   | Omphalozele, BlasenExstrophie, Analatresie (engl. Imperforate anus), kaudaler Neuralrohrdefekt (Spina bifida)                                        |
| Gastroschisis                  | Defekt zumeist rechts des Umbilicus mit unauffälliger Nabelschnurinsertion, frei in der Amnionhöhle flottierende Darmschlingen                       |
| Omphalocele                    | Defekt im Bereich des Umbilicus, mit Bruchsack aus Peritoneum. Herniation unterschiedlicher abdominalen Organe                                       |
| Blasen- oder Kloakenextrophie  | fehlende Darstellung der Harnblase, unauffällige Fruchtwassermenge, tief sitzender Nabelschnuransatz                                                 |

Differenzialdiagnosen umfassen andere Syndrome, die mit ventralen Defekten einhergehen (● **Tab. 1**).

Die Prognose ist abhängig von der Ausprägung der Fehlbildungen als sehr schlecht bis infaust anzusehen [17].

Eine überdurchschnittlich lange Nabelschnur geht mit einem erhöhten Risiko für Nabelschnurumschlingungen, Nabelschnurknoten und einem Nabelschnurvorfal einher. Diese Komplikationen gewinnen vor allem im 3. Trimenon an klinischer Bedeutung und werden im Verlauf des Artikels behandelt.

### Fetale und plazentare Nabelschnurinsertion

Im 1. Trimenon sind die Enden der Nabelschnur aufgrund der günstigen Platzverhältnisse in aller Regel gut darstellbar. Mit zunehmendem Schwangerschaftsalter kann dies, insbesondere bei einer Hinterwandplazenta, schwierig oder unmöglich sein. Beide Enden der Nabelschnur können Auffälligkeiten aufweisen, die einen Einfluss auf die weitere Schwangerschaftsbetreuung haben.

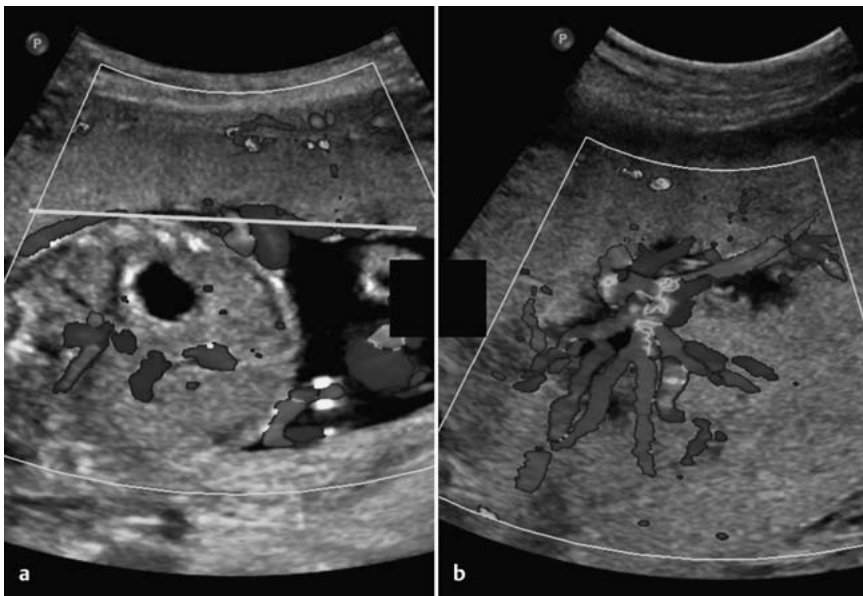

**Abb. 3 a und b** Normale Nabelschnurinsertion.  
**a** Darstellung der Nabelschnurinsertion und einiger Deckplattengefäße. Auch bei einer Vorderwandplazenta kann die Darstellung je nach Kindslage erschwert sein. Zur weiteren Differenzierung kann es hilfreich sein, die Plazenta tangential wie in Bildabschnitt **b** zu untersuchen. Hier ist der sternförmige Verlauf der Deckplattengefäße auf den Nabelschnuransatz zu erkennen. Plazentares Gewebe ist ringsherum sichtbar. Die gelbe Linie in **a** entspricht der Bildebene in **b**.

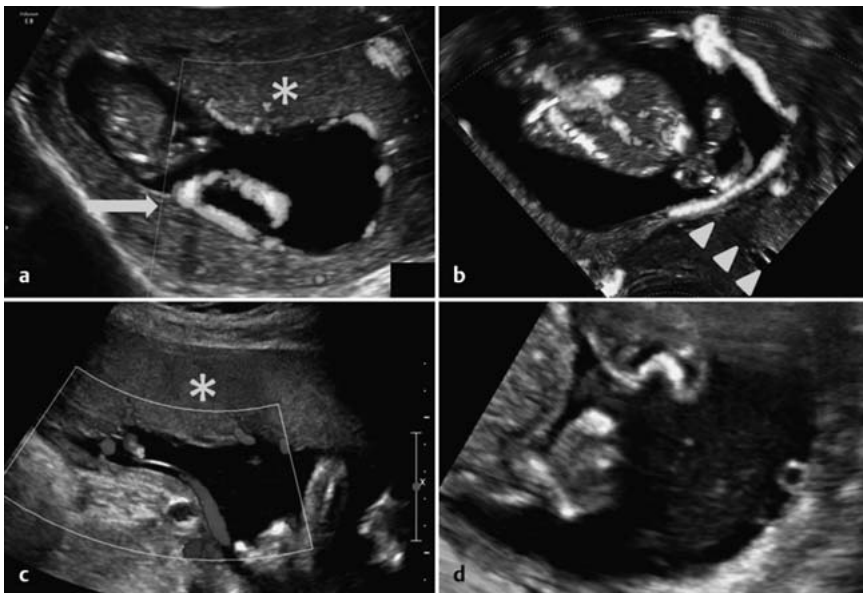

**Abb. 4 a bis d** Insertionspathologien.  
**a** Insertio velamentosa am Ende des 1. Trimenons. Der Nabelschnuransatz ist gegenüber des Chorion frondosum darstellbar.  
**b** Transvaginale Darstellung der gleichen Schwangerschaft wie in **a**. Ein velamentöses Gefäß verläuft direkt über dem Zervikalkanal (♣ Vasa praevia).  
**c und d** Darstellung von velamentösen Gefäßen im 2. Trimenon: **c** Längsschnitt, **d** Querschnitt. Diese Befunde müssen immer durch eine Beurteilung der placentaren Nabelschnurinsertion (Ausschluss Insertio velamentosa) und ganz besonders des unteren Uterinsegments (Ausschluss Vasa praevia) abgeklärt werden. Legende: Chorion frondosum/Plazenta (\*); Nabelschnuransatz (→); Zervikalkanal (♣).

### Placentare Nabelschnurinsertion

Neben der „normalen“ zentral oder parazentral gelegenen Nabelschnurinsertion existieren Insertionsanomalien mit peripherem Nabelschnuransatz. Klinisch bedeutsam ist ein Abstand der Nabelschnurinsertion von weniger als 2 cm zum Plazentarand. Beim marginalen Nabelschnuransatz (5–7% der Schwangerschaften) entspringt die Nabelschnur direkt aus dem Plazentarand [11, 18]. Insertionsanomalien gehen mit einer erhöhten Rate an intrauteriner Wachstumsverzögerung einher, weshalb bei Nachweis einer solchen Insertionspathologie das fetale Monitoring intensiviert werden sollte [19]. Praktisch lässt sich die placentare Nabelschnurinsertion unter Zuhilfenahme der Farbdopplersonografie durch Verfolgen der Deckplattengefäße auffinden. In höherer Woche kann man sich ggf. durch tangentielle Darstellung der Plazentaoberfläche einen Überblick verschaffen, sofern die direkte Darstellung des placentaren Nabelschnuransatzes nicht mehr gelingt (♣ **Abb. 3**). Hierbei lassen sich die sternförmig auf den Na-

belschnuransatz zulaufenden Deckplattengefäße farbdopplersonografisch visualisieren.

Als Insertionspathologie sollte insbesondere die Insertio velamentosa (1–2% der Schwangerschaften [11]) erkannt werden. Der Ursprung der eigentlichen Nabelschnur liegt hierbei außerhalb der Plazenta (♣ **Abb. 4a**), gebildet aus velamentös (umhüllt → hier: zwischen den Eihäuten – also zwischen Amnion und Chorion) verlaufenden Gefäßen. Im Gegensatz zu den eigentlichen Nabelschnurgefäßen sind sie nicht durch die stabilisierende Wharton-Sulze geschützt. Es besteht die erhöhte Gefahr der Kompression von Nabelschnurgefäßen, der fetalen Wachstumsverzögerung, vorzeitiger Wehentätigkeit, einer vorzeitigen Plazentalösung, CTG-Auffälligkeiten und niedrigen Apgar-Werten [11]. Besonders zu beachten ist die höhere Rate an Vasa praevia. Der Begriff „Vasa praevia“ beschreibt velamentös verlaufende Gefäße, die in unmittelbarer Nähe zur Zervix und vor dem „vorangehenden Teil“ liegen (♣ **Abb. 4b und d**) und mit einer Prävalenz von 0,04% auftreten [20]. Neben der Insertio velamentosa (Vasa

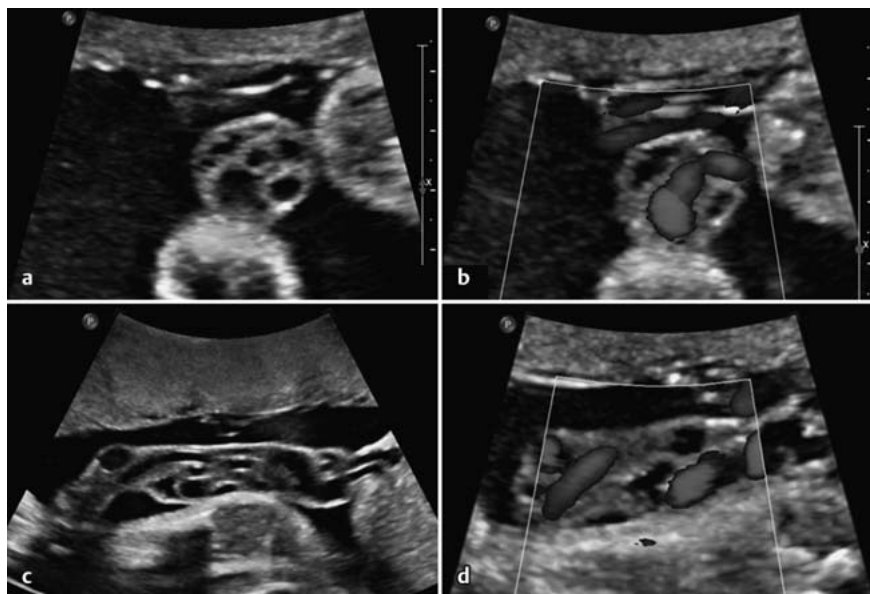

**Abb. 5a bis d** Zystisch aufgetriebenes Nabelschnursegment im Querschnitt (**a** und **b**), sowie im Längsschnitt (**c** und **d**). Dopplersonografisch lassen sich Zysten von perfundierten Gefäßen unterscheiden (**b** und **d**). Auch wenn das segmentale Auftreten und die unregelmäßige Form der Zysten an Pseudozysten denken lassen, ist die Differenzierung zu echten Zysten nur histologisch möglich. Bei dem Feten waren zusätzlich eine Agenesie des Septum pellucidum, eine Schizenzephalie und eine Insuffizienz der AV-Klappen nachweisbar.

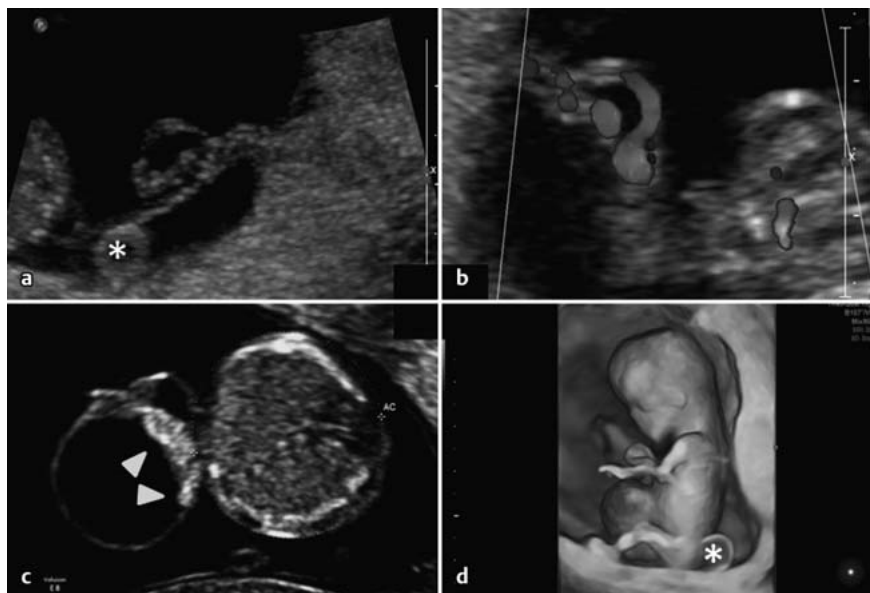

**Abb. 6a bis d**

**a** und **b** Darstellung einer Nabelschnurzyste in einem zentralen Segment der Nabelschnur im 1. Trimenon;

**c** und **d** Fet mit einer großen Nabelschnurzyste im Bereich der fetalen Nabelschnurinsertion. Die echogene Erscheinung der bauchwandnahen Zystenwandung (►) legt das Vorliegen eines Bauchwanddefekts nahe. Im Verlauf erfolgte der Nachweis einer Omphalozele. Legende: Dottersack (\*).

prævia Typ I) gehören zu den Risikofaktoren für Vasa prævia auch der Nachweis einer Nebenplazenta (Vasa prævia Typ II) [21], Mehrlingsschwangerschaften und Schwangerschaften nach assistierter Reproduktion [22]. Je näher die Gefäße am inneren Ostium liegen und Zug- und Scherkräften bei Geburtsbestrebungen, vor allem beim vorzeitigen Blasensprung, ausgesetzt sind, desto größer ist die Gefahr einer Gefäßruptur und der fetalen Massenblutung. Die vorgeburtliche Diagnose von Vasa prævia und die dadurch indizierte primäre Schnittentbindung vor dem Einsetzen von Wehentätigkeit kann die Überlebensrate von 44 auf 97% steigern [20]. Eine RDS-Prophylaxe sollte je nach Schwangerschaftsalter in Erwägung gezogen werden, da von einer erhöhten Rate an Frühgeburtlichkeit auszugehen ist [21, 23]. Pränatal liegt die Erkennungsrate der Vasa prævia, die in einem aktuellen systematischen Review genannt wird, bei 53–100% [24]. Die transvaginale Farbdopplersonografie ist für die Diagnostik am besten geeignet. In der Fläche dürfte die Erkennungsrate deutlich geringer sein. Rebarber et al. haben einen

Screeningalgorithmus vorgeschlagen, wonach eine transvaginale Ultraschallkontrolle bei jeder Schwangeren durchgeführt wird, die eines der folgenden Kriterien erfüllt [25]:

- Placenta prævia in der aktuellen Schwangerschaft, die jedoch im Verlauf nicht mehr nachweisbar ist
- Z.n. Vasa prævia in einer früheren Schwangerschaft
- Insertio velamentosa im unteren Uterinsegment
- Nebenplazenta im unteren Uterinsegment
- Mehrlingsschwangerschaft

Die gleichen Autoren zeigten, dass sich im eigenen großen Kollektiv (Gesamtkollektiv = 27 573 mit 31 Fällen von Vasa prævia) in 24% der Fälle die Vasa prævia im Verlauf nicht mehr darstellen ließen, wenn die Diagnose vor 26 SSW gestellt wurde. Wurde die Diagnose im 3. Trimenon gestellt, so persistierten die Vasa prævia.

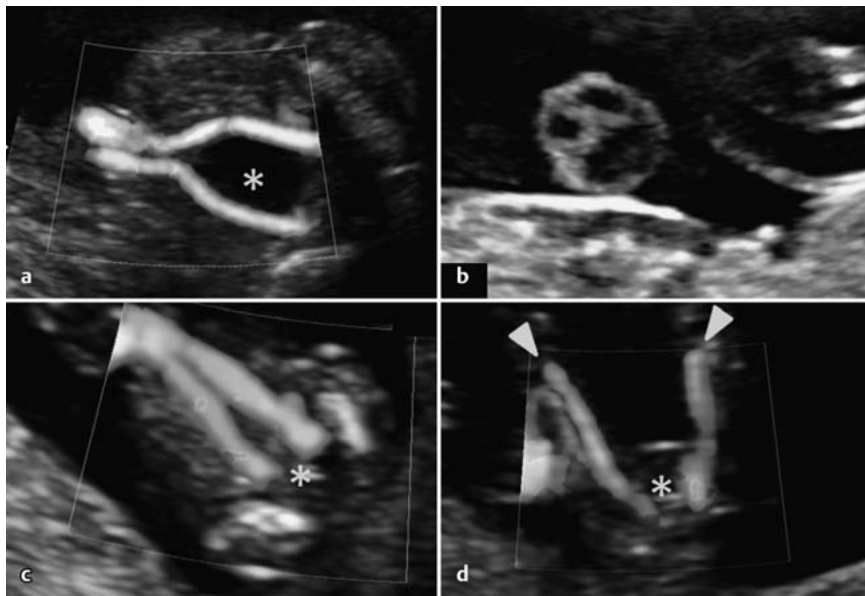**Abb. 7 a bis d**

**a** Paravesikaler Verlauf der Nabelschnurarterien bis zum fetalen Nabelschnuransatz.

**b** Querschnitt durch eine normale Nabelschnur. Die 3 Gefäßlumina erscheinen wie die stilisierte „Mickey Maus“.

**c** Darstellung zweier Nabelschnurarterien in ihrem paravesikalen Verlauf im 1. Trimenon bis zum fetalen Nabelschnuransatz.

**d** Durch die räumliche Nähe besteht im 1. Trimenon eine Verwechslungsmöglichkeit mit den Femoralarterien (▶). Legende: Harnblase (\*).

### Fetale Nabelschnurinsertion

Auf der fetalen Seite können ebenfalls Auffälligkeiten im Bereich des Nabelschnuransatzes auffallen. Die größte Bedeutung haben die Bauchwanddefekte (Gastroschisis und Omphalozele), die im Bereich des Nabelschnuransatzes lokalisiert sind. Sowohl die Gastroschisis als auch die Omphalozele treten mit einer Inzidenz um 3 : 10 000 auf, wobei sie bei der Gastroschisis aus bislang nicht geklärter Ursache in den vergangenen Jahren angestiegen ist [16]. Im 1. Trimenon ist die Omphalozele von der physiologischen Nabelhernie abzugrenzen, die im Rahmen der Darmrotation auftritt. Ihre Rückbildung endet regulär vor der 12. SSW. Die Nabelschnur bzw. deren fetaler Ansatz sind anatomische Leitstruktur zur Darstellung und wichtiges Kriterium zur Differenzierung von Bauchwanddefekten. Die Omphalozele tritt im Bereich des Umbilikus auf. Der Defekt ist von einem peritonealen Überzug umgeben, wobei die Nabelschnur in diesen Bruchsack inseriert. Zu bedenken ist die vergleichsweise hohe Rate an genetischen Auffälligkeiten. Bei der Gastroschisis inseriert die Nabelschnur regelrecht in der Bauchwand, in den allermeisten Fällen linksseitig vom Bauchwanddefekt. Die Eingeweide liegen bei dieser Fehlbildung frei in der Amnionhöhle. Während der Karyotyp regelhaft unauffällig ist, liegt die Rate an assoziierten Fehlbildungen bei ca. 10% [26]. Eine detaillierte Besprechung geht über das Thema der vorliegenden Arbeit hinaus [16].

### Nabelschnurzysten

Zysten können über die gesamte Länge der Nabelschnur auftreten (● Abb. 5 und 6) und werden mit einer Inzidenz von 0,4 bis 3,4% im 1. Trimenon dargestellt [27,28]. Histologisch können sie nach ihrer Entstehung in echte (epithelialisierte) und Pseudozysten (lakunäre Erweiterungen der Wharton-Sulze) unterteilt werden.

Echte Zysten können als Überbleibsel der Allantois, des Ductus omphaloentericus oder als Gefäßfehlbildungen auftreten. Gerade echte Zysten können mit Fehlbildungen (u.a. Omphalozele, Urachusfistel) und Chromosomenstörungen (v.a. Trisomie 18) vergesellschaftet sein. Die meisten Berichte liegen in Form von Case Reports und kleinen Fallserien vor, weshalb Zahlen zu Komplikationen und zum Verlauf nur bedingt verfügbar sind.

Nabelschnurzysten sollten mittels gezielter Fehlbildungsdiagnostik abgeklärt werden. Viele Zysten, die im 1. Trimenon darstellbar sind, verschwinden bis ins 2. Trimenon (ca. 80% [11]) – eine Entwicklung, die mit einer guten Prognose einhergeht [29]. Nabelschnurzysten im 2. und 3. Trimenon sind aufgrund der oben genannten Assoziationen mit einer ungünstigeren Prognose behaftet [28].

### Anzahl der Gefäße/singuläre Nabelschnurarterie

Die Nabelschnur wird in der frühen Anlage aus 4 Gefäßen gebildet. In dieser Phase gibt es 2 Nabelschnurarterien und 2 Nabelschnurvenen, von denen typischerweise die rechte bis zur 6. SSW atrophiert. Die normale Nabelschnur besteht somit aus 2 Arterien und einer Vene. Während eine persistierend 4-gefäßige Nabelschnur selten vorliegen kann [30], ist die häufigste Variante die Nabelschnur mit singulärer Nabelschnurarterie (2 Gefäße: eine Vene und nur eine Arterie; SUA = single umbilical artery) mit einer Inzidenz von ca. 0,5% im 2. Trimenon [31].

Die Darstellung der Nabelschnurarterien erfolgt entweder im Bereich der freien Nabelschnur oder besser auf Höhe der fetalen Harnblase durch farbdopplersonografischen Nachweis ihres paravesikalen Verlaufs (● Abb. 7).

Die Diagnose einer singulären Nabelschnurarterie kann auf dieser Ebene mittels Farbdopplersonografie mit hochauflösenden Ultraschallgeräten bereits im 1. Trimenon gestellt werden. Bei der Darstellung sollte auf eine niedrige Pulsrepetitionsfrequenz (PRF) und einen hohen „Farbgain“ geachtet werden, da ansonsten ein im Vergleich zur Gegenseite schmales Gefäß leicht übersehen werden kann (● Abb. 7 c und d).

In früher Schwangerschaftswoche besteht außerdem die Gefahr einer Verwechslung mit den fetalen Femoralarterien, weshalb die paravesikal verlaufenden Nabelschnurarterien bis zum Umbilikus dargestellt werden sollten (● Abb. 8 c und d).

Die Verdachtsdiagnose „singuläre Nabelschnurarterie“ im 1. Trimenon sollte später bestätigt werden (● Abb. 8 a und b). Das Lumen der vorhandenen Nabelarterie ist kompensatorisch in der Regel größer als bei einer 3-gefäßigen Nabelschnur mit einem Durchmesser Verhältnis von  $\leq 2$  (Umbilikalvene/Umbilikalarterie; bei der 3-gefäßigen Nabelschnur liegt es  $> 2$ ) [32].

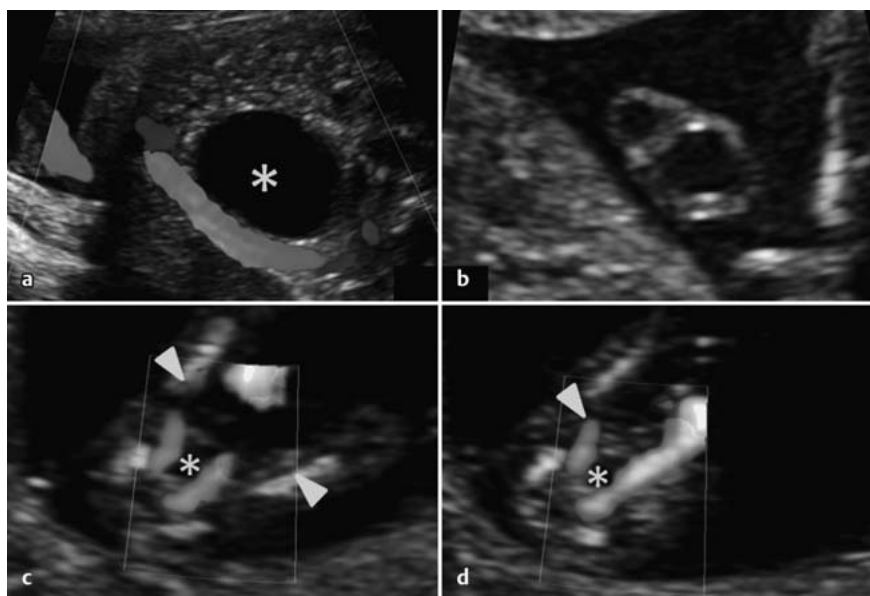

**Abb. 8 a bis d** Singuläre Nabelschnurarterie.  
**a und b** Singuläre Nabelschnurarterie im 2. Trimenon – paravesikal (**a**) und im Querschnitt (**b**).  
**c und d** Singuläre Nabelschnurarterie im 1. Trimenon, paravesikal – es ist auf eine niedrige Pulsrepetitionsfrequenz und einen hohen „Farbgain“ sowie auf die Abgrenzung zu den nahe liegenden Femoralarterien zu achten (▶) (Gefäßverlauf bis zum fetalen Nabelschnuransatz – Vergleiche auch ◉ **Abb. 7 c und d**). Legende: Harnblase (\*).

Die klinische Bedeutung der singulären Nabelschnurarterie liegt vor allem in der Assoziation zu Auffälligkeiten im Herz-Kreislauf- und Urogenitalsystem des Feten, sowie zu selteneren gastrointestinalen und ZNS-Auffälligkeiten [11]. Ungefähr ein Drittel der Feten mit singulärer Nabelschnurarterie weisen strukturelle Veränderungen auf, während ca. 10% von einer Chromosomenstörung betroffen sind [31]. Aktuelle Daten zeigen jedoch, dass eine isoliert vorliegende SUA das Risiko für Chromosomenstörungen nicht signifikant erhöht [31,33].

Eine singuläre Nabelschnurarterie gilt als Marker für die Entwicklung einer fetalen Wachstumsrestriktion und Frühgeburtlichkeit [34].

Dem Nachweis einer singulären Nabelschnurarterie sollte immer eine differenzierte Beurteilung der fetalen Sonoanatomie mit besonderem Fokus auf das kardiovaskuläre und das urogenitale System folgen. Intensivierte Kontrollen wegen des erhöhten Risikos einer IUGR werden kontrovers diskutiert [11,31].

### Diagnostik im 2. Trimenon

Im 2. Trimenon kann die Beurteilbarkeit der Nabelschnur in ihrem Verlauf z. B. durch fetale Überlagerung bei einer Hinterwandplazenta oder durch Bildung eines Nabelschnurkonvoluts erschwert sein. Durch das zunehmende Größenwachstum lassen sich jedoch die einzelnen Gefäße besser beurteilen. So erfolgt die Diagnose der oben beschriebenen singulären Nabelschnurarterie häufig im 2. Trimenon. Strukturelle Veränderungen der Nabelvene fallen ebenfalls meist im 2. Trimenon auf.

### Strukturelle Veränderungen der Nabelschnurvene

Zwei Strukturvarianten der Nabelvene haben eine klinische Bedeutung – beide betreffen ihren intraabdominellen Verlauf.

#### Persistierende rechte Umbilikalvene (PRUV)

Typischerweise atrophiert eine (in der Regel die rechte) der paarig angelegten Nabelvenen bis zur 7. SSW. Die linke Nabelvene zieht intraabdominal zunächst nach dorsal und mündet in das Pfortadersystem. Im abdominalen Querschnitt (gering kaudal der Biometrieebene) verlaufen die umbilikoportalen Gefäße bo-

genförmig nach rechts. Dabei scheinen sie die fetale Gallenblase zu „umkreisen“, während der Magen tangential passiert wird (◉ **Abb. 9 a**).

In ihrem Verlauf zweigen Äste des Pfortadersystems und der Ductus venosus (ungefähr im Scheitelpunkt des Bogens nach dorsal) ab (◉ **Abb. 9 b**). Eine detaillierte Beschreibung der hepatischen Venen wurde kürzlich von Chaoui et al. im Rahmen eines CME-Artikels in deutscher und englischer Sprache publiziert [35].

Atrophiert die linke Nabelvene, so persistiert die rechte (PRUV). Die Inzidenz wird mit einer Größenordnung von 0,5–3 : 1000 angegeben [11,36]. Sonografisch unterscheidet sie sich, bei idealer Darstellbarkeit, durch den spiegelbildlichen Verlauf des Bogens nach links auf den Magen zu. Hier liegt die Gallenblase medial – und somit ebenfalls innerhalb des Gefäßbogens. Die Darstellung wie in ◉ **Abb. 10** ist meist schwieriger, da die Gallenblase etwas weiter kaudal der Nabelvene liegt.

Die persistierende rechte Nabelvene ist als Normvariante ohne klinische Bedeutung anzusehen, sofern sie intrahepatisch an das Pfortadersystem anschließt (intrahepatische Variante der PRUV mit Ausbildung des Ductus venosus). In der embryonalen Entwicklung existieren jedoch extrahepatische Verbindungen zwischen den Umbilikalvenen und dem Sinus venosus (spätere Verbindung zum rechten Vorhof), die obliterieren, während eine Anastomose zwischen einer Umbilikalvene und den Lebersinusoïden entsteht [36]. Persistiert die rechte Umbilikalvene, so kommt es häufiger zum Ausbleiben dieser Anastomosierung und die extrahepatische Verbindung zum rechten Vorhof bleibt bestehen (ohne Ausbildung des Ductus venosus). Bei der extrahepatischen Verbindung kommt es zu einer erhöhten rechtsventrikulären Vorlast, da der gesamte umbilikalvenöse Blutfluss an der Leber vorbei direkt zum rechten Vorhof geleitet wird. Konsequenz kann es zur Entwicklung einer klinisch relevanten Rechtsherzbelastung bis zur Entstehung eines Hydrops fetalis kommen.

Entsprechend sollte der Diagnose einer PRUV der Ausschluss weiterer kardiovaskulärer Anomalien folgen. Das klinische Vorgehen ist abhängig vom Vorliegen von Begleitfehlbildungen. Bei isolierter PRUV mit intrahepatischem Anschluss an das Pfortadersystem ist die Prognose sehr gut [36].

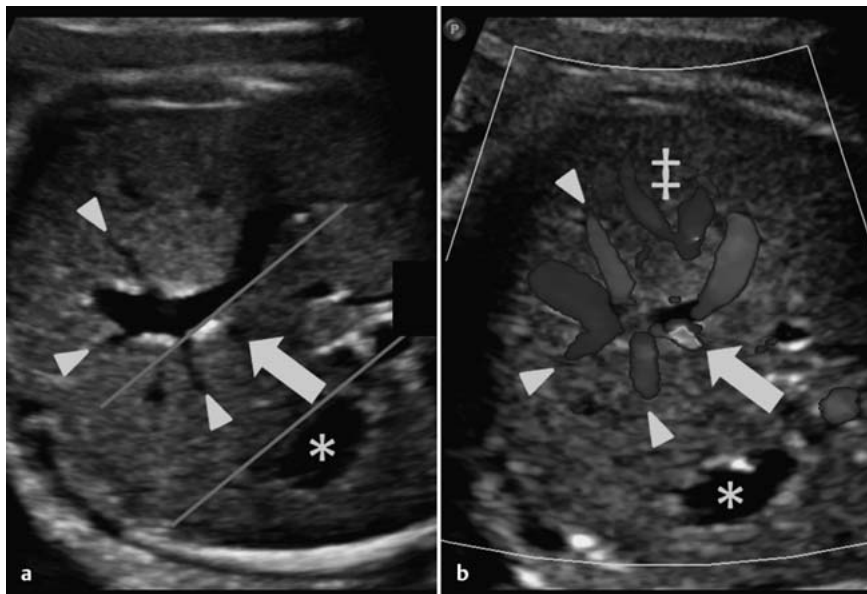

**Abb. 9a und b** Normale Anatomie: intraabdominaler Verlauf der Nabelvene und Anschluss an das Pfortadersystem. Die grünen Linien in Abschnitt **a** verdeutlichen den tangentialen Verlauf des Gefäßbogens in Bezug zum fetalen Magen (\*). Sichtbar sind die Abgänge der linken Portalvene (▶) und des Ductus venosus (→). In Abschnitt **b** ist der Ductus venosus durch einen Farbumschlag zu erkennen („Aliasing“ – bedingt durch eine Flussbeschleunigung). Legende: Lebervenen (§).

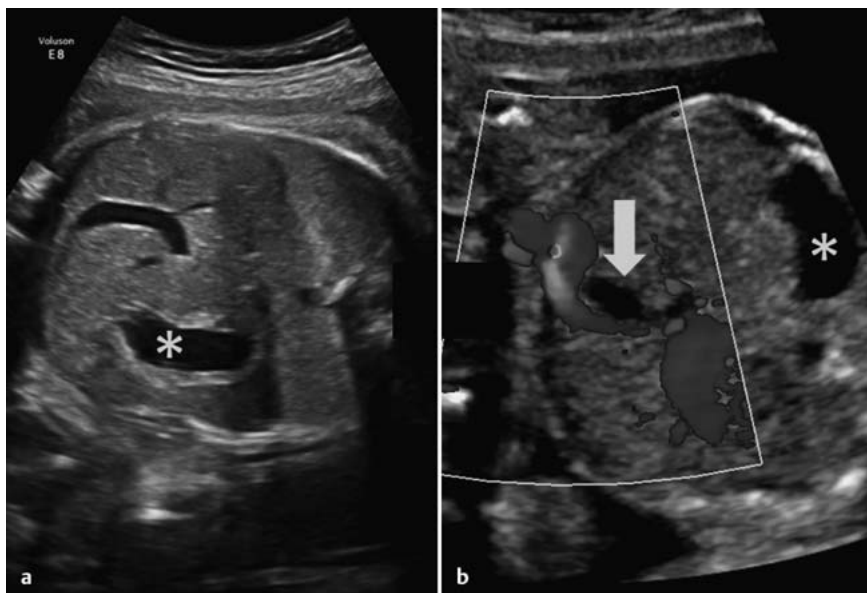

**Abb. 10a und b** Persistierende rechte Nabelvene (PRUV). Der Gefäßbogen läuft auf den Magen zu (Vergleiche Abb. 9). Die Gallenblase (→) liegt medial der rechten Umbilikalvene. Legende: Magen (\*).

### Nabelvenenvarix

Eine Aufweitung der Nabelvene in ihrem extrahepatischen Verlauf kurz hinter der fetalen Nabelschnurinsertion lässt sich mit einer Inzidenz von ungefähr 2,8 : 1000 darstellen und wird Nabelvenenvarix genannt [37]. Sonomorphologisch fällt sie durch eine rundliche Gefäßweitung  $\geq 9$  mm [38] bzw. mehr als 50% über dem Durchmesser der intrahepatischen Nabelvene auf [39] (Abb. 11).

Die Diagnose einer Nabelvenenvarix sollte aufgrund assoziierter Chromosomenstörungen (insbesondere der Trisomie 21) und anderen Auffälligkeiten stets eine gezielte Untersuchung des Feten nach sich ziehen [37,40]. Ebenfalls beschrieben ist eine erhöhte Rate an intrauteriner Wachstumsretardierung und an intrauterinem Fruchttod. Da Fälle von intrauterinem Fruchttod trotz engmaschiger Überwachung auch bei isolierter Nabelvenenvarix beschrieben wurden, wird der optimale Entbindungszeitpunkt kontrovers diskutiert, beginnend mit 34 abgeschlossenen Schwangerschaftswochen [41,42].

### Diagnostik im 3. Trimenon

#### ▼ Nabelschnurumschlingungen/Nabelschnurvorfälle

Nabelschnurumschlingungen (die Nabelschnur liegt mindestens einmal komplett um den fetalen Hals – seltener um den Körper) haben eine mit dem Gestationsalter ansteigende Inzidenz von bis zu 33% am Termin [43]. Obwohl Nabelschnurumschlingungen in den allermeisten Fällen keinen negativen Einfluss auf das perinatale Outcome haben, werden höhere Raten an Nabelschnurkompression als Ursache für fetalen Distress bis hin zur fetalen Asphyxie oder zum intrauterinen Fruchttod diskutiert. Trotz der z.T. existenziellen Bedeutung der genannten Nabelschnurkomplikationen sprechen aktuelle Daten gegen ein erhöhtes Risiko, sofern weniger als 3 Umschlingungen vorliegen [43]. Dennoch löst die Diagnose bei vielen Schwangeren erhebliche Ängste und Unsicherheit aus, was bei der Beratung zu berücksichtigen ist. Eine besondere Form von Nabelschnurumschlingungen kann bei monoamnialen Zwillingsschwangerschaften auftreten

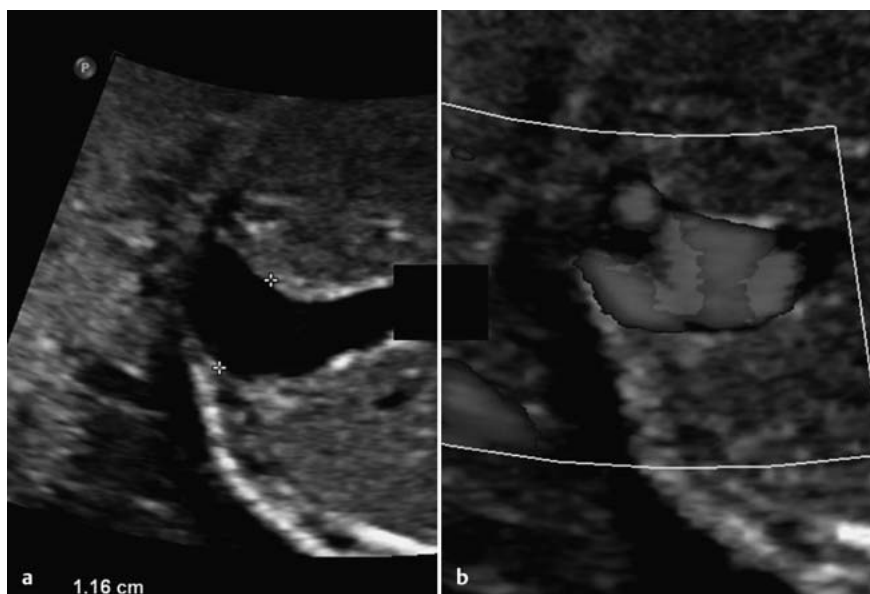

**Abb. 11 a und b** Nabelvenenvarix mit einem Durchmesser von 11,6 mm. Dopplersonografisch ist ein turbulenter Fluss darstellbar, da sich innerhalb der Aussackung Verwirbelungen bilden.

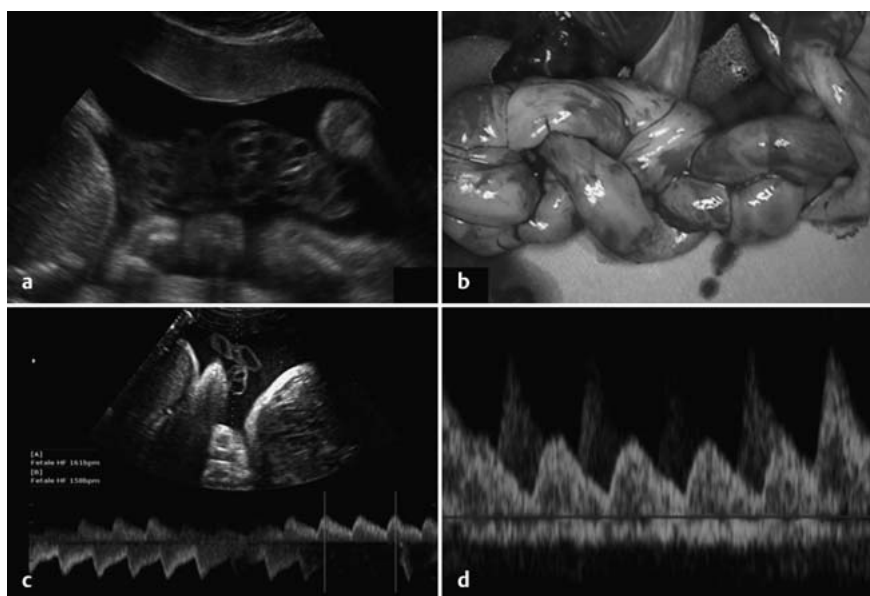

**Abb. 12 a bis d** Nabelschnurkonvolut bei monoamniotischer Zwillingsschwangerschaft.

**a** Sonografische Darstellung.

**b** Makroskopischer Blick auf die umwundenen Nabelschnüre.

**c und d** Dopplersonografische Beurteilung von umwundenen Nabelschnüren. Es sind parallel zueinander unabhängige Kurven sichtbar (Fet 1 und Fet 2).

(**Abb. 12**). Durch die freie Beweglichkeit beider Feten in der gemeinsamen Fruchthöhle sind Nabelschnurumschlingungen, -knoten oder die Bildung regelrechter Nabelschnurkonvolute die Regel [44]. Bei einem insgesamt hohen Risiko monoamniotischer Zwillingsschwangerschaften (Mortalität 8–42% [44]) besteht aktuell kein Konsens zur pränatalen Überwachung und zum optimalen Entbindungszeitpunkt. Der Nachweis eines Nabelschnurkonvoluts bei monoamniotischer Zwillingsschwangerschaft scheint jedoch keinen signifikanten Einfluss auf das Gesamtrisiko zu haben [45].

Von einem Nabelschnurvorfall wird gesprochen, wenn nach erfolgtem Blasensprung die Nabelschnur als vorangehender Teil nach intrazervikal oder intravaginal prolapiert. Hiervon zu unterscheiden ist die vorangehende Nabelschnur ohne Geburtsbestrebungen. Der Nabelschnurvorfall geht mit einer hohen fetalen Mortalität von bis zu 50% einher [11], wobei aktuelle Daten einen Rückgang auf unter 10% bei steigender Sectiorate zeigen [46]. Vor allem fetale Lageanomalien, aber auch Frühgeburtlich-

keit und ein geringes Geburtsgewicht, Anomalien des mütterlichen Beckens, ein Polyhydramnion, eine Nabelschnurlänge > 80 cm und andere Faktoren (männliches Geschlecht, Mehrlinge, Placenta praevia und geburtshilfliche Eingriffe) sind mit einem erhöhten Risiko für einen Nabelschnurvorfall assoziiert, der dann zur notfallmäßigen Entbindung zwingt [46].

Risikofaktoren wie mehrfache Nabelschnurumschlingungen, die sehr tiefe plazentare Nabelschnurinsertion oder auch ein Polyhydramnion sollten dem geburtshilflichen Team möglichst bekannt sein, damit der Geburtsverlauf und insbesondere das intra-partale CTG unter dem Aspekt dieser Risikofaktoren interpretiert und das Geburtsmanagement ggf. modifiziert werden kann.

### Echte und falsche Knoten

Eine Nabelschnurkompression kann außerdem durch Zuziehen eines echten Nabelschnurknotens auftreten. Im Gegensatz zum echten Knoten gibt es variköse Erweiterungen von Nabelschnurgefäßen, die aufgrund ihrer äußeren Erscheinung wie ein Knoten

imponieren können. Die ektatischen Gefäße zeigen einen geschlängelten Verlauf, sind jedoch nicht im Sinne eines Knotens umschlungen und können sich nicht zuziehen. Man bezeichnet diese Aussackungen als falschen Nabelschnurknoten.

Überwiegend wird die Diagnose eines Nabelschnurknotens nachgeburtlich gestellt.

Die pränatale Diagnose eines echten Nabelschnurknotens ist möglich – auch sie geht in der Regel mit einer starken Verunsicherung der Schwangeren einher. Derzeit fehlen definierte diagnostische Kriterien und Standards zum klinischen Vorgehen, und es gibt eine relativ hohe Rate an Fehldiagnosen. Der Diagnose eines Nabelschnurknotens sollten dennoch die ausführliche Dopplersonografie der Nabelschnur und eine engmaschige Schwangerschaftsüberwachung folgen [47, 48].

### Nabelschnurtumoren

Tumoren der Nabelschnur sind sehr selten und es handelt sich in den meisten Fällen um Hämangiome oder Teratome. Wie auch bei Nabelschnurhämatomen (s.u.) können Tumoren mit Gefäßkompressionen einhergehen.

Nabelschnurhämangiome imponieren pränatal zumeist als echoogene Strukturen mit dopplersonografisch darstellbarer Perfusion. Multizystische Varianten erschweren die Abgrenzung zu Teratomen oder Hämatomen [11]. Angaben zur Mortalität liegen um 40%. Assoziierte Fehlbildungen sind beschrieben, ohne dass eine Häufung bestimmter Veränderungen ableitbar wäre [49].

Teratome der Nabelschnur sind für gewöhnlich benigne Tumoren. Ihr Erscheinungsbild im Ultraschall ist uneinheitlich, häufig sowohl mit zystischen als auch mit soliden Anteilen. Gleichzeitig auftretende Fehlbildungen sind in rund der Hälfte der publizierten Fälle beschrieben. Teratome können beträchtliche Ausmaße annehmen und Ursache einer fetalen Herzinsuffizienz sein („high-output heart failure“). Eine besondere Gefahr, die mit Nabelschnurteratomen einhergeht, ist die Ruptur von Nabelschnurgefäßen [50].

### Besondere Fragestellungen

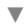

#### Dopplersonografie

Die dopplersonografische Untersuchung der Nabelschnur ist bedingt durch ihre Länge und ihren variablen Verlauf auch in hoher Woche relativ leicht durchführbar. Durch ihren flexiblen Verlauf lassen sich die Gefäße zumeist in einem Winkel darstellen, der die Ableitung einer qualitativ guten Spektralkurve ermöglicht. Ebenfalls aufgrund ihrer Länge und ihres geschlängelten Verlaufs ist jedoch eine Standardisierung im Sinne einer exakten Definition eines untersuchten Segments und einer winkeltreuen Dopplermessung schwer möglich.

Die Nabelschnurarterien sind die Gefäße, die am häufigsten zur Beurteilung der fetalen Zirkulation herangezogen werden. Sie geben Aufschluss über das fetoplazentare Gefäßbett und können im Falle einer Widerstandszunahme eine fetale Gefährdung relativ früh anzeigen.

Die Untersuchung des Blutflusses in der Nabelschnur erfolgt vor allem im Rahmen der Differenzierung zwischen einer kompensierten und einer dekompenzierten Plazentainsuffizienz bei intrauteriner Wachstumsverzögerung. Verschiedene (semi-)quantitative und qualitative Bewertungen können vorgenommen werden. Auch die Nabelvene kann Aufschluss über den fetalen Status geben. Mit ihrer Hilfe lässt sich eine Aussage über das fetale zentralvenöse Gefäßbett treffen. Auffälligkeiten sind bspw. im

Rahmen einer Rechtsherzinsuffizienz mit Vorlasterhöhung zu beobachten.

Häufig werden weitere fetale und/oder maternale Gefäße in die Gesamtbeurteilung einbezogen. Zur ausführlichen Betrachtung der Dopplersonografie der Nabelschnur sei auf Lehrbücher zur Anwendung der Dopplersonografie in der Geburtshilfe verwiesen.

### Invasive Diagnostik/Nabelschnurhämatoome

Im Rahmen der fetalen Anämiediagnostik, der fetalen Infektionsdiagnostik sowie speziellen Fragen der genetischen Diagnostik kann durch eine Nabelschnurpunktion fetales Blut für die weitere Analyse gewonnen werden. Ultraschallgesteuert wird dabei die Nabelvene punktiert. Über den gleichen Weg lässt sich bei entsprechender Indikation eine fetale Anämie durch intrauterine Transfusion korrigieren. Das methodenbedingte Abortrisiko dieses Eingriffs liegt bei 1% (Fetus ohne Fehlbildungen) [51].

Eine sehr seltene Komplikation ist die Entwicklung eines Nabelschnurhämatoms, das bei entsprechender Größe die Gefäße der Nabelschnur komprimieren und somit die Zirkulation beeinträchtigen kann [52].

Auch eine spontane Hämatombildung ist möglich. Beschriebene Risikofaktoren umfassen: eine kurze Nabelschnur, einen Nabelschnurvorfal, eine Insertio velamentosa [53] oder fetale Gerinnungsstörungen [54]. Nabelschnurhämatoome gehen mit einer hohen Asphyxie-/Verlustrate einher.

### Fazit für die Praxis

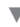

Eine detaillierte Untersuchung der Nabelschnur liefert Befunde, die vielfältige Aspekte der fetalen Entwicklung betreffen. Da die Darstellung einiger Details mit zunehmender Schwangerschaftswoche schwieriger wird, lohnt es sich, bereits in der Frühschwangerschaft eine gezielte Untersuchung der Nabelschnur vorzunehmen.

Dem Nachweis von Auffälligkeiten, welche die Anzahl, die Struktur oder den Verlauf der Nabelschnurgefäße betreffen, sollte immer eine weiterführende Diagnostik folgen, da Assoziationen zu weiteren strukturellen (insbesondere kardiovaskulären) und chromosomalen Veränderungen bestehen. Treten sie isoliert auf, ist die Prognose zumeist günstig. Besondere Aufmerksamkeit sollte der fetalen und der plazentaren Nabelschnurinsertion gewidmet werden.

### Interessenkonflikt

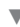

Nein.

### Literatur

- 1 Ferguson VL, Dodson RB. Bioengineering aspects of the umbilical cord. Eur J Obstet Gynecol Reprod Biol 2009; 144 (Suppl. 1): S108–S113
- 2 Raio L, Ghezzi F, Di Naro E et al. Sonographic measurement of the umbilical cord and fetal anthropometric parameters. Eur J Obstet Gynecol Reprod Biol 1999; 83: 131–135
- 3 Gordon Z, Eytan O, Jaffa AJ et al. Hemodynamic analysis of Hyrtl anastomosis in human placenta. Am J Physiol Regul Integr Comp Physiol 2007; 292: R977–R982
- 4 Bhutia KL, Sengupta R, Upreti B et al. Pregnancy-induced hypertension is associated with altered anatomical patterns of Hyrtl's anastomosis. Anat Rec (Hoboken) 2014; 297: 819–825
- 5 Raio L, Ghezzi F, di Naro E et al. In-utero characterization of the blood flow in the Hyrtl anastomosis. Placenta 2001; 22: 597–601

- 6 Raio L, Ghezzi F, Di Naro E et al. Prenatal assessment of the Hyrtl anastomosis and evaluation of its function: case report. *Hum Reprod* 1999; 14: 1890–1893
- 7 Strong TH Jr., Jarles DL, Vega JS et al. The umbilical coiling index. *Am J Obstet Gynecol* 1994; 170: 29–32
- 8 Mittal A, Nanda S, Sen J. Antenatal umbilical coiling index as a predictor of perinatal outcome. *Arch Gynecol Obstet* 2015; 291: 763–768
- 9 Narayan R, Saaid R, Pedersen L et al. Ultrasound assessment of umbilical cord morphology in the first trimester: a feasibility study. *Fetal Diagn Ther* 2015; [Epub ahead of print]
- 10 Verkleij CP, van Oppen AC, Mulder EJ et al. Evaluation of antenatal umbilical coiling index at 16–21 weeks of gestation as a predictor of trisomy 21 and other chromosomal defects. *Ultrasound Obstet Gynecol* 2013; 42: 545–552
- 11 Moshiri M, Zaidi SF, Robinson TJ et al. Comprehensive imaging review of abnormalities of the umbilical cord. *Radiographics* 2014; 34: 179–196
- 12 Jessop FA, Lees CC, Pathak S et al. Umbilical cord coiling: clinical outcomes in an unselected population and systematic review. *Virchows Arch* 2014; 464: 105–112
- 13 Rayburn WF, Beynen A, Brinkman DL. Umbilical cord length and intra-partum complications. *Obstet Gynecol* 1981; 57: 450–452
- 14 Hill LM, DiNofrio DM, Guzick D. Sonographic determination of first trimester umbilical cord length. *J Clin Ultrasound* 1994; 22: 435–438
- 15 Murphy A, Platt LD. First-trimester diagnosis of body stalk anomaly using 2- and 3-dimensional sonography. *J Ultrasound Med* 2011; 30: 1739–1743
- 16 Prefumo F, Izzi C. Fetal abdominal wall defects. *Best Pract Res Clin Obstet Gynaecol* 2014; 28: 391–402
- 17 Smrcek JM, Germer U, Krokowski M et al. Prenatal ultrasound diagnosis and management of body stalk anomaly: analysis of nine singleton and two multiple pregnancies. *Ultrasound Obstet Gynecol* 2003; 21: 322–328
- 18 Ugurlucan FG, Yuksel A. Is complete umbilical cord scanning possible at the second-trimester ultrasound scan? *J Clin Ultrasound* 2014; DOI: 10.1002/jcu.22242
- 19 Hasegawa J, Matsuoka R, Ichizuka K et al. Ultrasound diagnosis and management of umbilical cord abnormalities. *Taiwan J Obstet Gynecol* 2009; 48: 23–27
- 20 Oyelese Y, Catanzarite V, Prefumo F et al. Vasa previa: the impact of prenatal diagnosis on outcomes. *Obstet Gynecol* 2004; 103: 937–942
- 21 Rao KP, Belogolovkin V, Yankowitz J et al. Abnormal placentation: evidence-based diagnosis and management of placenta previa, placenta accreta, and vasa previa. *Obstet Gynecol Surv* 2012; 67: 503–519
- 22 Oyelese Y, Smulian JC. Placenta previa, placenta accreta, and vasa previa. *Obstet Gynecol* 2006; 107: 927–941
- 23 Gagnon R, Morin L, Bly S et al. SOGC CLINICAL PRACTICE GUIDELINE: guidelines for the management of vasa previa. *Int J Gynaecol Obstet* 2010; 108: 85–89
- 24 Rutter L, Kok N, Limpens J et al. Systematic review of accuracy of ultrasound in the diagnosis of vasa previa. *Ultrasound Obstet Gynecol* 2015; 45: 516–522
- 25 Rebarber A, Dolin C, Fox NS et al. Natural history of vasa previa across gestation using a screening protocol. *J Ultrasound Med* 2014; 33: 141–147
- 26 Mastroliacono P, Lisi A, Castilla EE et al. Gastroschisis and associated defects: an international study. *Am J Med Genet A* 2007; 143A: 660–671
- 27 Bonilla F Jr., Raga F, Villalaz E et al. Umbilical cord cysts: evaluation with different 3-dimensional sonographic modes. *J Ultrasound Med* 2010; 29: 281–285
- 28 Zangen R, Boldes R, Yaffe H et al. Umbilical cord cysts in the second and third trimesters: significance and prenatal approach. *Ultrasound Obstet Gynecol* 2010; 36: 296–301
- 29 Hannaford K, Reeves S, Wegner E. Umbilical cord cysts in the first trimester: are they associated with pregnancy complications? *J Ultrasound Med* 2013; 32: 801–806
- 30 Avnet H, Shen O, Mazaki E et al. Four-vessel umbilical cord. *Ultrasound Obstet Gynecol* 2011; 38: 604–606
- 31 Voskamp BJ, Fleurke-Rozema H, Oude-Rengerink K et al. Relationship of isolated single umbilical artery to fetal growth, aneuploidy and perinatal mortality: systematic review and meta-analysis. *Ultrasound Obstet Gynecol* 2013; 42: 622–628
- 32 Sepulveda W, Peek MJ, Hassan J et al. Umbilical vein to artery ratio in fetuses with single umbilical artery. *Ultrasound Obstet Gynecol* 1996; 8: 23–26
- 33 Dagklis T, Defigueiredo D, Staboulidou I et al. Isolated single umbilical artery and fetal karyotype. *Ultrasound Obstet Gynecol* 2010; 36: 291–295
- 34 Mailath-Pokorny M, Worda K, Schmid M et al. Isolated single umbilical artery: evaluating the risk of adverse pregnancy outcome. *Eur J Obstet Gynecol Reprod Biol* 2015; 184: 80–83
- 35 Chaoui R, Heling KS, Karl K. Ultrasound of the fetal veins part 1: the intrahepatic venous system. *Ultraschall Med* 2014; 35: 208–228
- 36 Weichert J, Hartge D, Germer U et al. Persistent right umbilical vein: a prenatal condition worth mentioning? *Ultrasound Obstet Gynecol* 2011; 37: 543–548
- 37 Lee SW, Kim MY, Kim JE et al. Clinical characteristics and outcomes of antenatal fetal intra-abdominal umbilical vein varix detection. *Obstet Gynecol Sci* 2014; 57: 181–186
- 38 Allen SL, Bagnall C, Roberts AB et al. Thrombosing umbilical vein varix. *J Ultrasound Med* 1998; 17: 189–192
- 39 Sepulveda W, Mackenna A, Sanchez J et al. Fetal prognosis in varix of the intrafetal umbilical vein. *J Ultrasound Med* 1998; 17: 171–175
- 40 Byers BD, Goharkhay N, Mateus J et al. Pregnancy outcome after ultrasound diagnosis of fetal intra-abdominal umbilical vein varix. *Ultrasound Obstet Gynecol* 2009; 33: 282–286
- 41 Zalel Y, Lehavi O, Heifetz S et al. Varix of the fetal intra-abdominal umbilical vein: prenatal sonographic diagnosis and suggested in utero management. *Ultrasound Obstet Gynecol* 2000; 16: 476–478
- 42 Valsky DV, Rosenak D, Hochner-Celnikier D et al. Adverse outcome of isolated fetal intra-abdominal umbilical vein varix despite close monitoring. *Prenat Diagn* 2004; 24: 451–454
- 43 Kong CW, Chan LW, To WW. Neonatal outcome and mode of delivery in the presence of nuchal cord loops: implications on patient counselling and the mode of delivery. *Arch Gynecol Obstet* 2015; 292: 283–289
- 44 Dias T, Mahsud-Dornan S, Bhide A et al. Cord entanglement and perinatal outcome in monoamniotic twin pregnancies. *Ultrasound Obstet Gynecol* 2010; 35: 201–204
- 45 Rossi AC, Prefumo F. Impact of cord entanglement on perinatal outcome of monoamniotic twins: a systematic review of the literature. *Ultrasound Obstet Gynecol* 2013; 41: 131–135
- 46 Lin MG. Umbilical cord prolapse. *Obstet Gynecol Surv* 2006; 61: 269–277
- 47 Hasbun J, Alcalde JL, Sepulveda W. Three-dimensional power Doppler sonography in the prenatal diagnosis of a true knot of the umbilical cord: value and limitations. *J Ultrasound Med* 2007; 26: 1215–1220
- 48 Abuhamad A. Three-dimensional ultrasound with color Doppler imaging of an umbilical cord true knot. *Ultrasound Obstet Gynecol* 2014; 43: 360
- 49 Sathiyathan S, Jeyanthan K, Hamid R. Umbilical hemangioma: a case report. *Arch Gynecol Obstet* 2011; 283 (Suppl. 1): 15–17
- 50 Satge DC, Laumond MA, Desfarges F et al. An umbilical cord teratoma in a 17-week-old fetus. *Prenat Diagn* 2001; 21: 284–288
- 51 Berry SM, Stone J, Norton ME et al. Fetal blood sampling. *Am J Obstet Gynecol* 2013; 209: 170–180
- 52 Tongsong T, Wanapirak C, Kunaviketikul C et al. Cordocentesis at 16–24 weeks of gestation: experience of 1,320 cases. *Prenat Diagn* 2000; 20: 224–228
- 53 Seoud M, Aboul-Hosn L, Nassar A et al. Spontaneous umbilical cord hematoma: a rare cause of acute fetal distress. *Am J Perinatol* 2001; 18: 99–102
- 54 Jouannelle C, Giansily-Blaizot M, Monpoux F et al. Spontaneous umbilical cord haematoma and congenital factor VII deficiency. *Haemophilia* 2012; 18: e24–e25
